# Supplementary material for: First Emergence of Resistance to Macrolides and Tetracycline Identified in Mannheimia haemolytica and Pasteurella multocida Isolates from Beef Feedlots in Australia
Source: MDPI journal article supplement (doi:10.3390/microorganisms9061322), 2021-06-17
Supplement: s1 [file s1]

Supplementary Material:

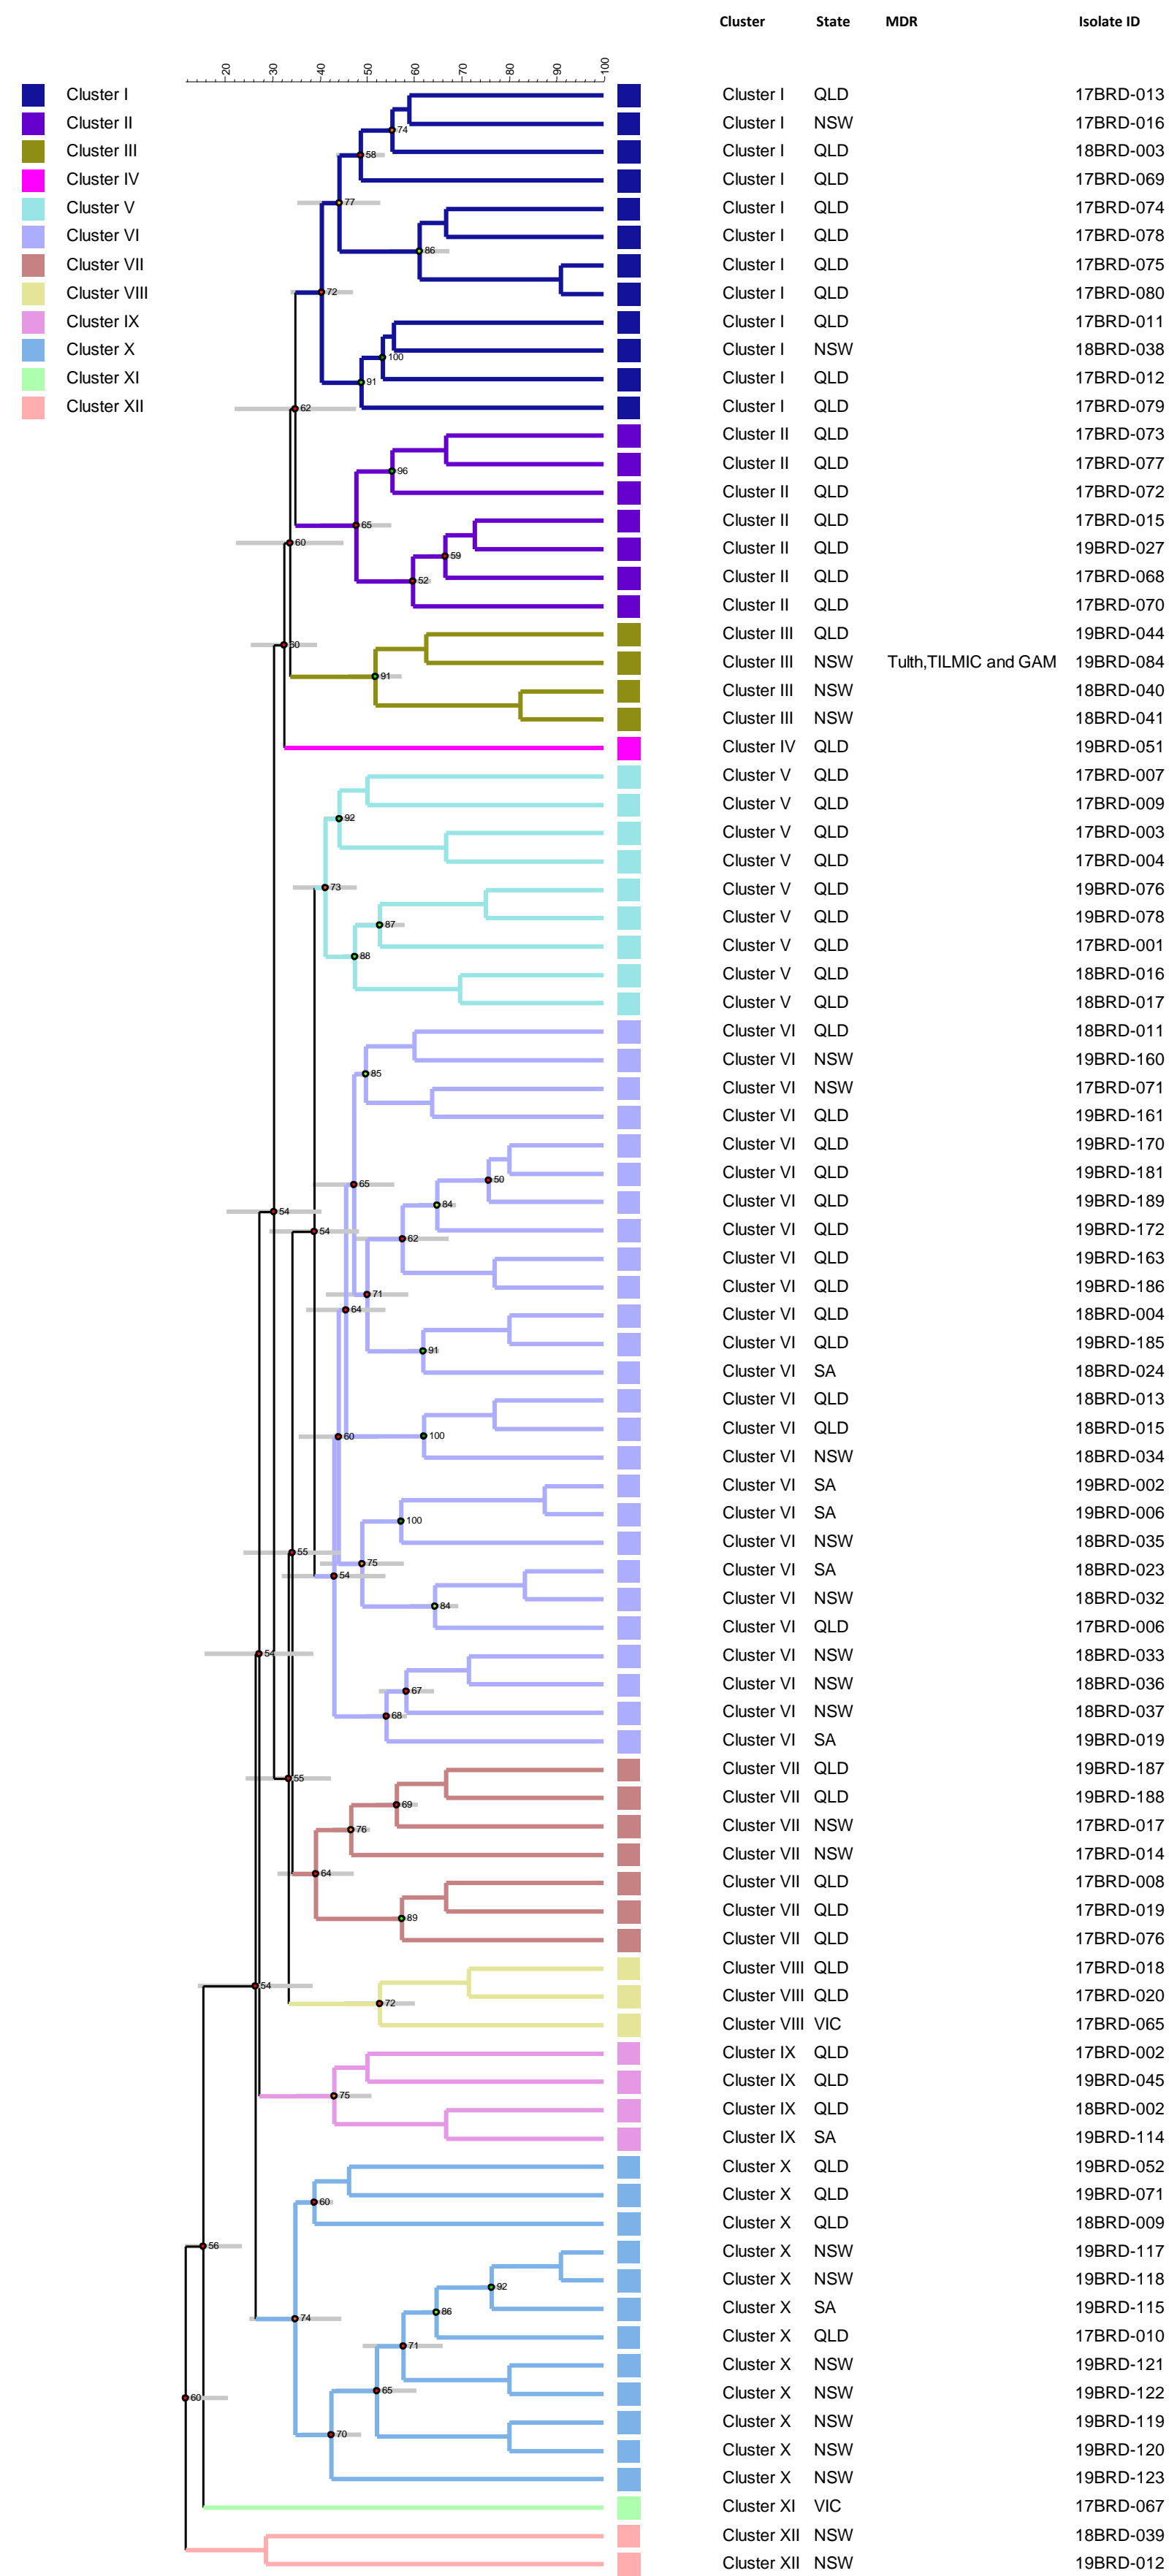

**Figure S1.** Random amplified polymorphic profiles and antimicrobial susceptibility profiles of 88 *M. haemolytica* strains. The dendrogram was generated with BioNumerics (Applied Maths) based on the Dice coefficient. The cluster number, Australian state of origin (NSW, New South Wales; QLD, Queensland; VIC, Victoria; SA, South Australia), multidrug-resistance (MDR) status (Tulth, tulthromycin, TLMIC, tilmicosin and GAM, gamithromycin resistant) and isolate identification number, are from right to left side, respectively.

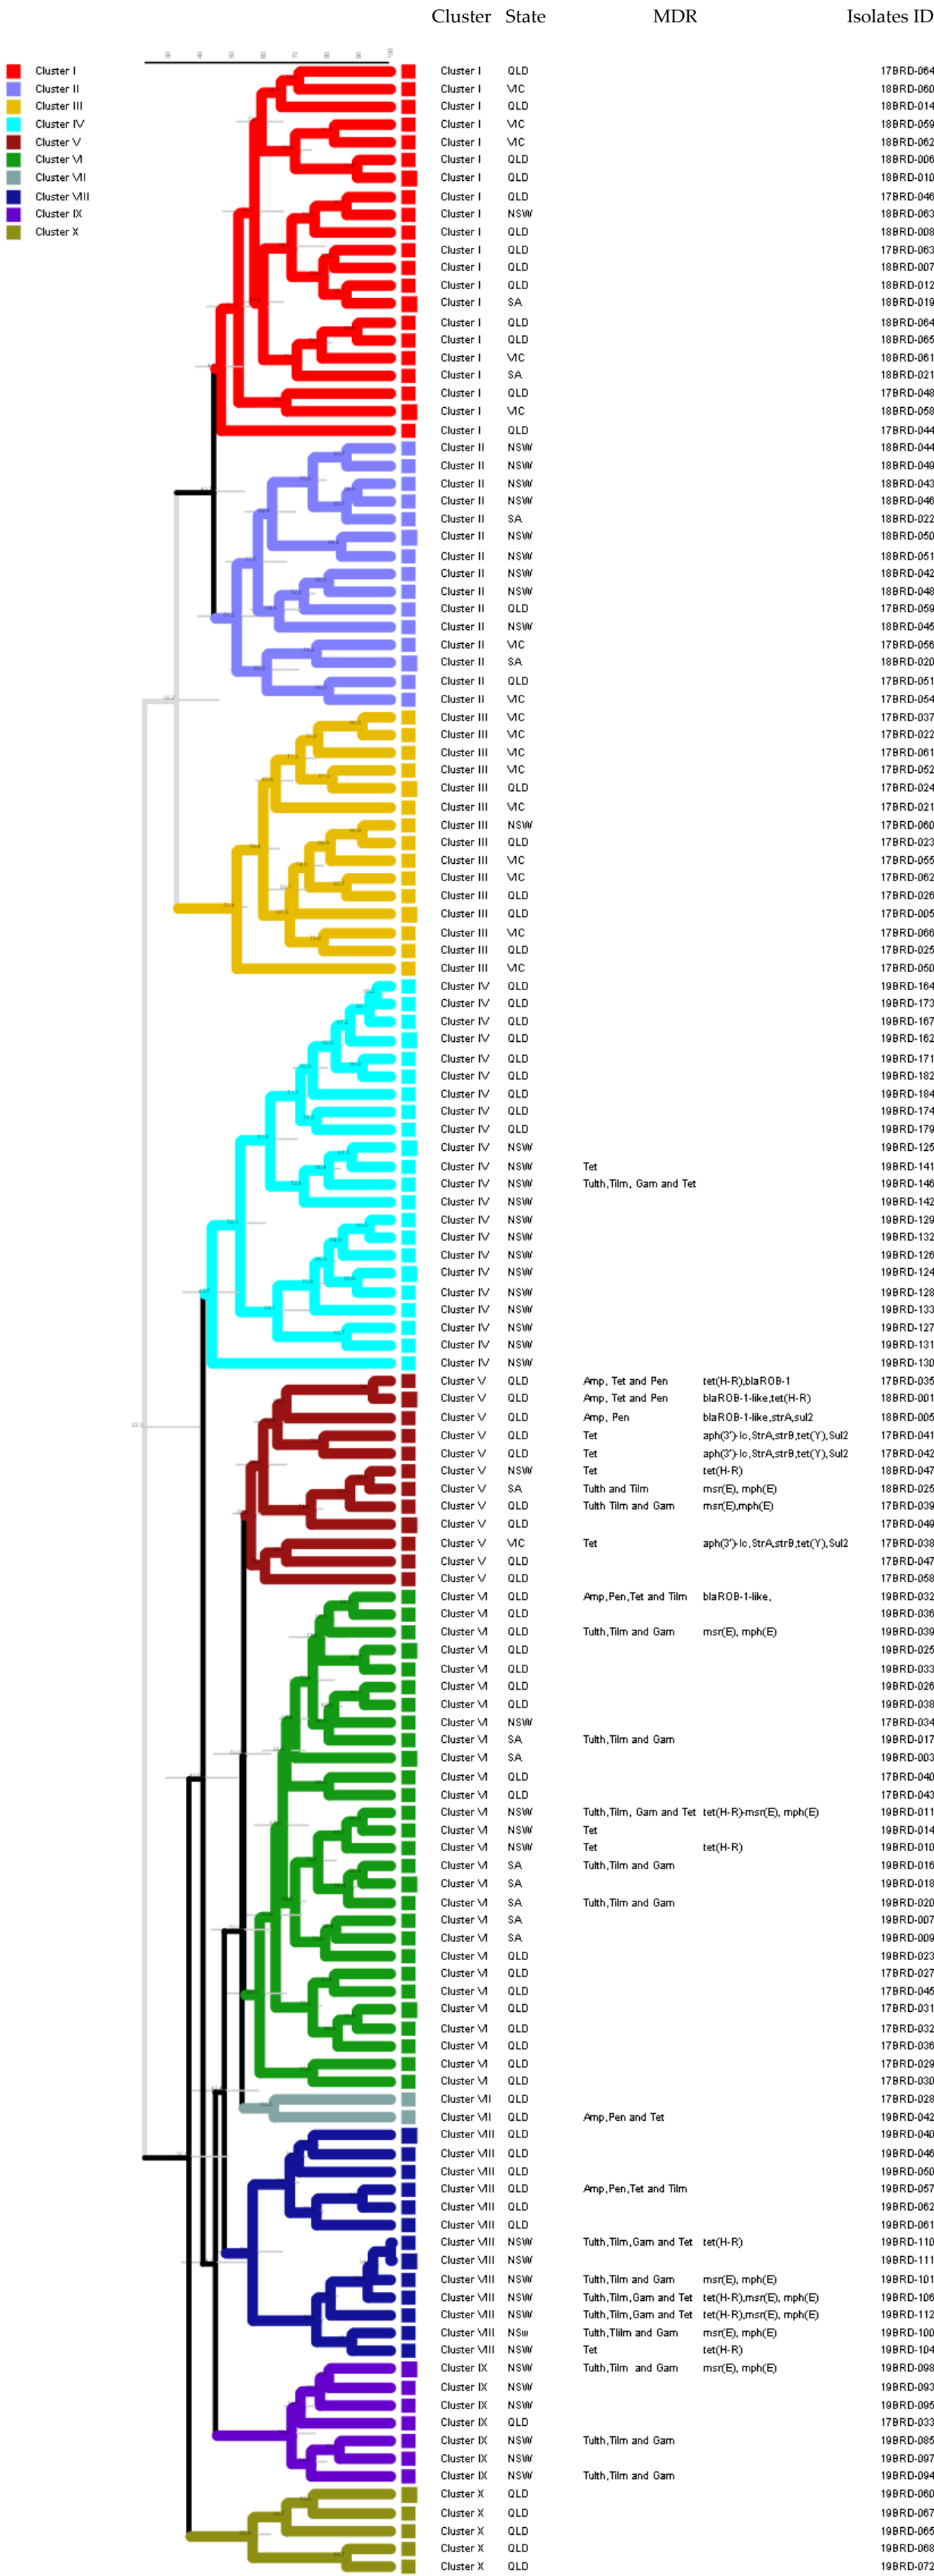

**Figure S2.** Random amplified polymorphic profiles and antimicrobial susceptibility profiles and antimicrobial susceptibility profiles of 140 *P. multocida* strains. The dendrogram was generated with BioNumerics program (Applied Maths) based on the Dice coefficient. The cluster number, Australian state of origin (NSW, New South Wales; QLD, Queensland; VIC, Victoria; SA, South Australia), multidrug-resistance (MDR) status (Tulth, tulthromycin, TLMIC, tilmicisin, GAM, gamithromycin, AMP, ampicilin and Pen, penicillin resistant) and isolate identification number, are from right to left side, respectively.
